# Supplementary material for: Risk of the hydrogen economy for atmospheric methane
Source: PubMed Central journal article supplement (PMC9747913; doi:10.1038/s41467-022-35419-7), 2022-12-13
Supplement: 41467_2022_35419_MOESM1_ESM.pdf [file 41467_2022_35419_MOESM1_ESM.pdf]

# Supplementary Information for 'Risk of The Hydrogen Economy For Atmospheric Methane'

Matteo B. Bertagni, Stephen Pacala, Fabien Paulot  
and Amilcare Porporato

\*Corresponding author(s). E-mail(s): [matteobb@princeton.edu](mailto:matteobb@princeton.edu);

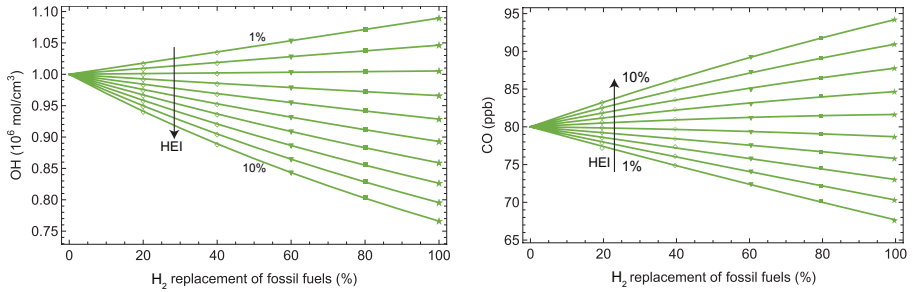

**Supplementary Figure 1** Steady state concentrations of OH and CO. Equilibrium [OH] and [CO] vs the percentage of fossil fuel replacement by green H<sub>2</sub>. Scenarios of Fig. 2 in the main text. HEI is the hydrogen emission intensity.

## 2 Risk of The Hydrogen Economy For Atmospheric Methane

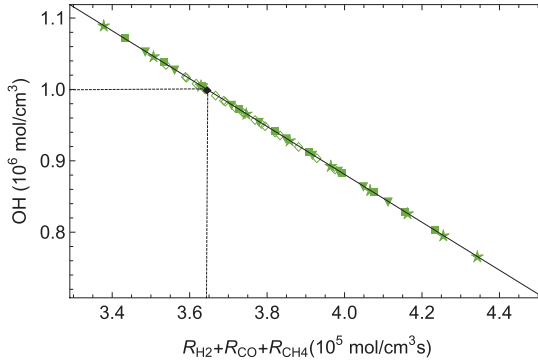

**Supplementary Figure 2** Relationship between OH concentration and sinks. [OH] vs the sum of CH<sub>4</sub>, CO and H<sub>2</sub> tropospheric sinks for the green H<sub>2</sub> scenarios of Fig. 2 in the main text. We find a linear relationship since  $R_{\text{CH}_4} + R_{\text{CO}} + R_{\text{H}_2} = S_{\text{OH}} - k_4[\text{X}][\text{OH}]$  from eq. (8) in the main text. More detailed atmospheric chemistry models sometimes find a nonlinear scaling with exponent  $-3/2$ , but with large inter and intramodel variability (see Ref. [39] in the main text).

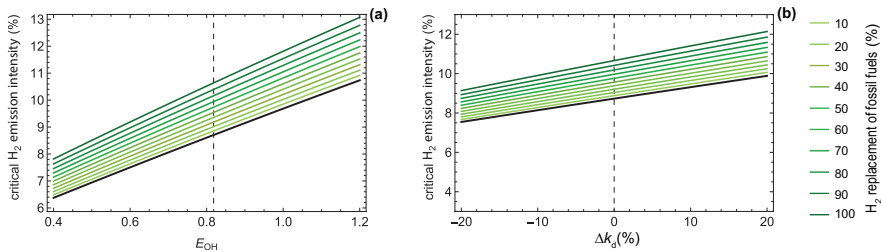

**Supplementary Figure 3** Critical H<sub>2</sub> emission intensity (HEI). Critical HEI of green H<sub>2</sub> for methane mitigation as a function of (a) the OH excess ( $E_{\text{OH}}$ ) and (b) the rate of H<sub>2</sub> soil uptake. Black lines are  $\text{HEI}_{\text{cr}}$  from eq. (16) in the main text. Colored lines are obtained numerically for a finite replacement of fossil fuel energy with green H<sub>2</sub>.
