# Supplementary material for: Risk of the hydrogen economy for atmospheric methane
Source: PubMed Central journal article supplement (PMC9747913; doi:10.1038/s41467-022-35419-7), 2022-12-13
Supplement: 41467_2022_35419_MOESM3_ESM.pdf [file 41467_2022_35419_MOESM3_ESM.pdf]

## **Description of Additional Supplementary Files:**

**Supplementary Dataset 1:** Mathematica notebook with the minimalist atmospheric model. The notebook contains all analyses, results, and figures presented in the manuscript.
